# Supplementary material
Source: HighWire-hosted journal article supplement (https://bmjopenquality.bmj.com/highwire/filestream/136247/field_highwire_adjunct_files/1/ds6217.pdf)

**RCS Compliance (%)**

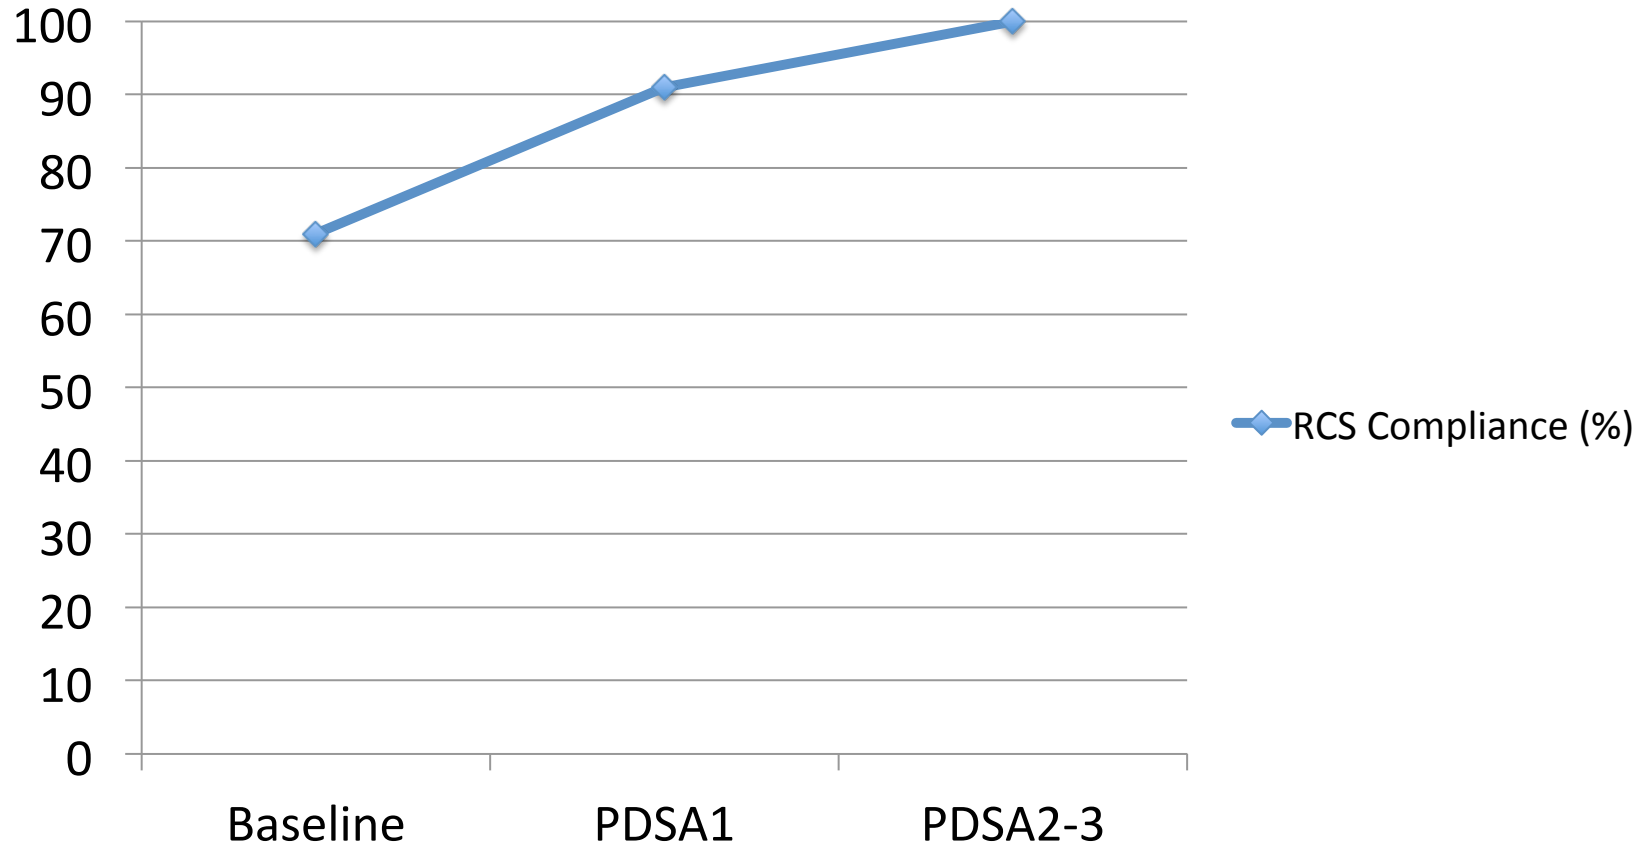

**Type Delay (days)**

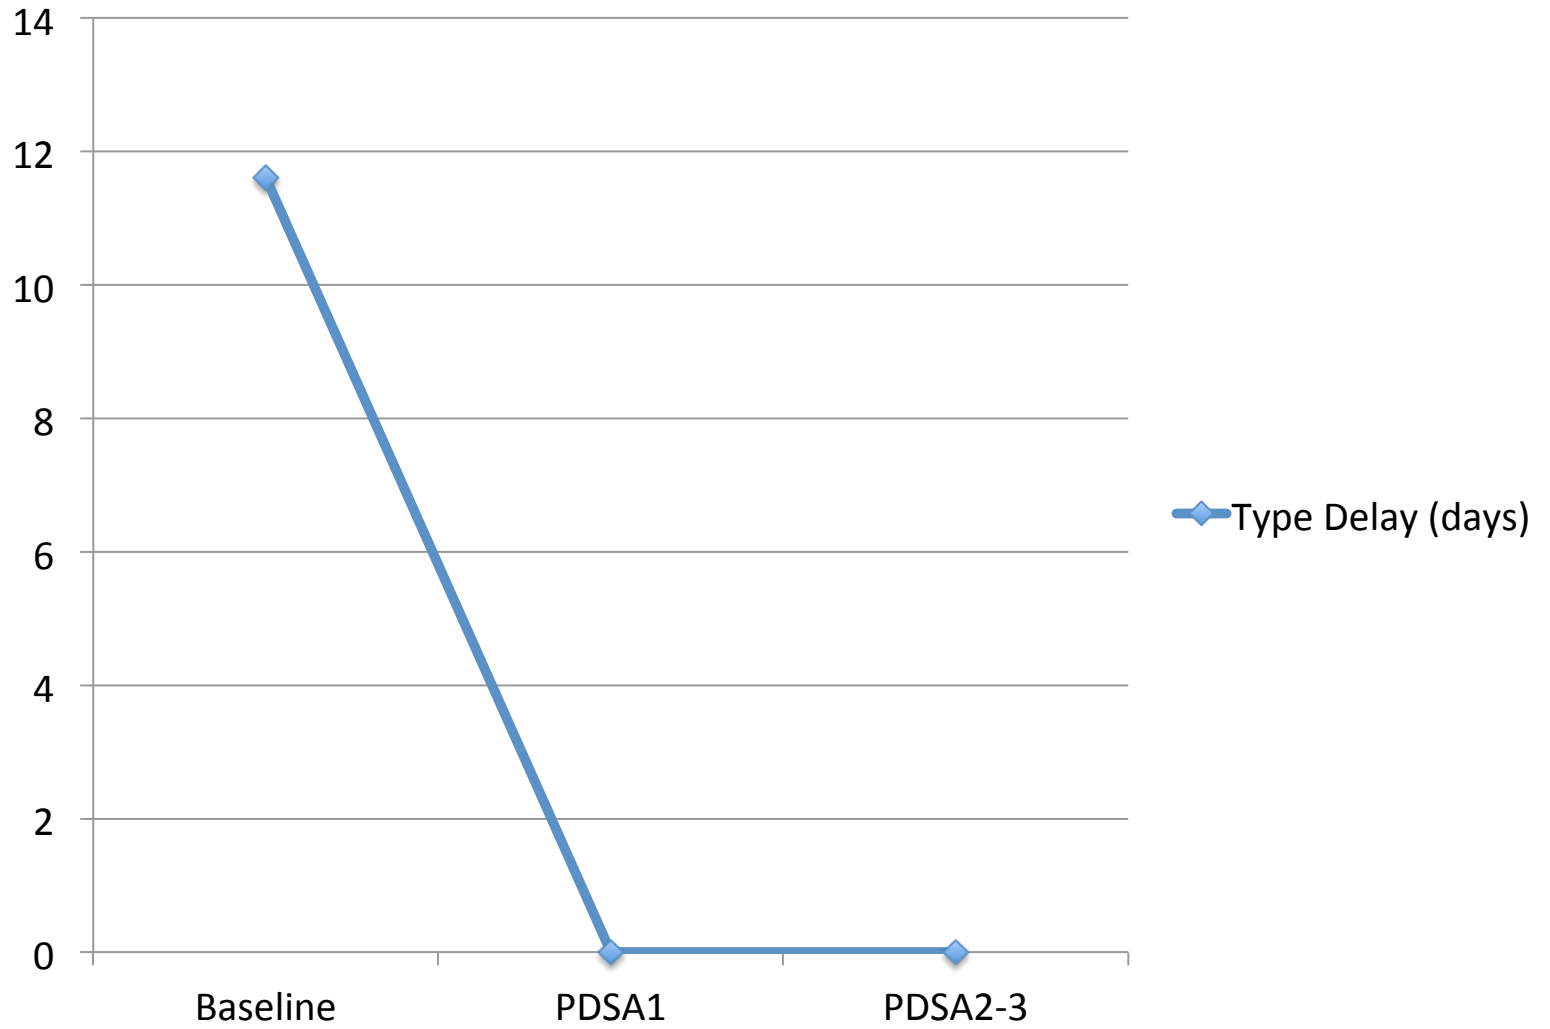

Supplement: ds6217.pdf [file ds6217.pdf]
